# Supplementary material for: Programmed cell death activated by Rose Bengal in Arabidopsis thaliana cell suspension cultures requires functional chloroplasts
Source: PubMed Central journal article supplement (PMC4071827; doi:10.1093/jxb/eru151), 2014-04-10
Supplement: supp_eru151_jexbot120030_file001.pdf [file supp_eru151_jexbot120030_file001.pdf]

Figure S1

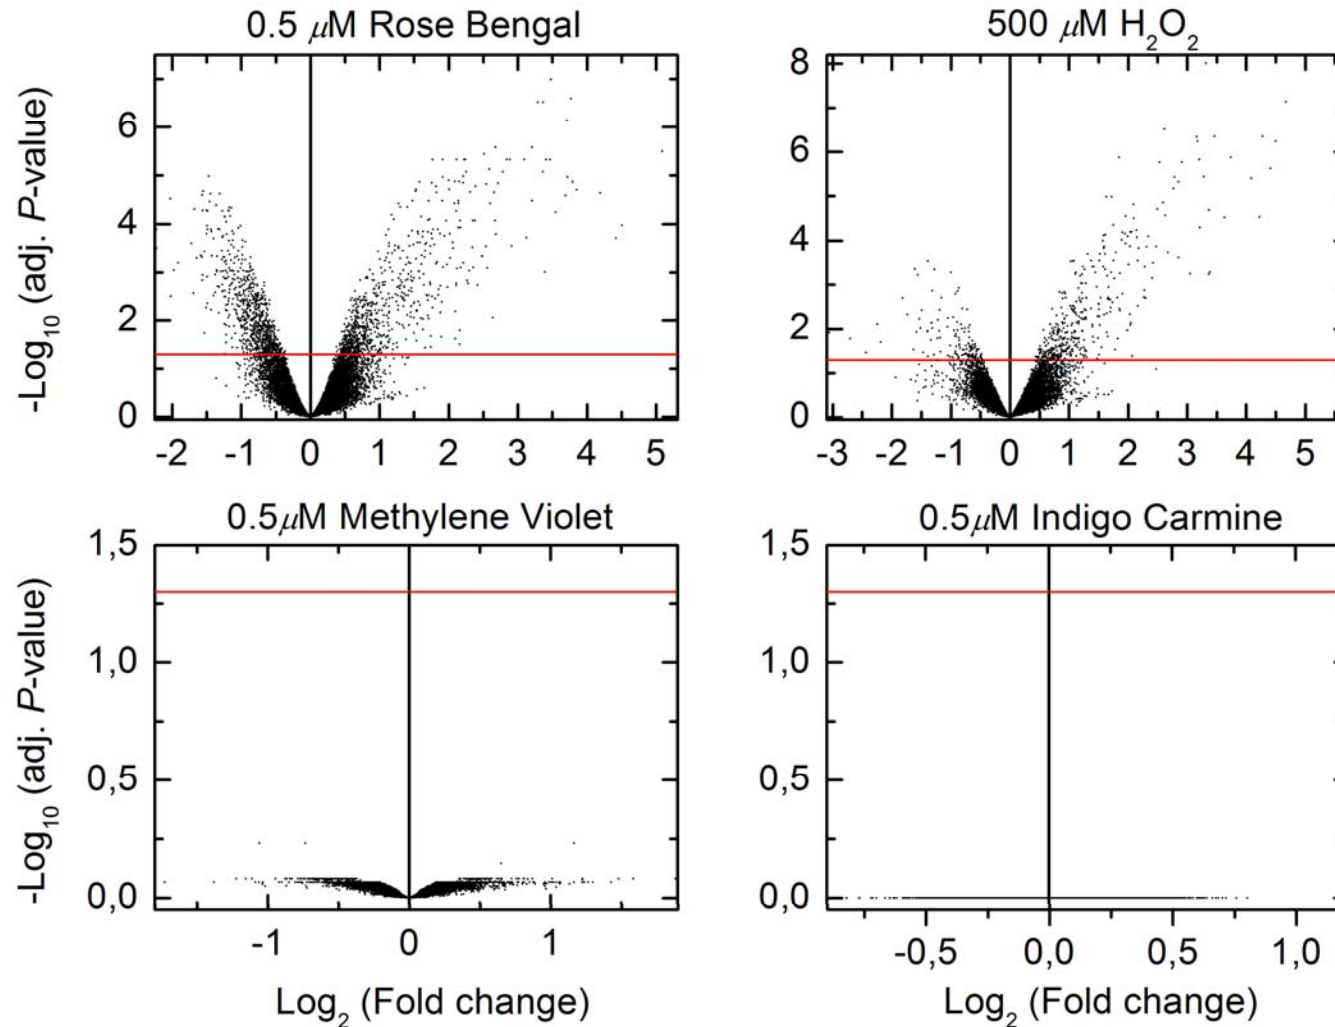

**Supplemental Figure S1.** Volcano plots of the microarray experiments: For each transcript in every comparative treatment the negative  $\text{Log}_{10}$  of the adjusted  $P$ -value is represented versus  $\text{Log}_2$  of the fold change. Whereas the treatments with 0.5  $\mu\text{M}$  RB and 500  $\mu\text{M}$   $\text{H}_2\text{O}_2$  clearly show transcripts with statistically significant differential expression (dots above the horizontal red line, adjusted  $p$ -value < 0.05), the treatments with 0.5  $\mu\text{M}$  IC and 0.5  $\mu\text{M}$  MV did not exhibit any transcripts with statistically significant differential expression (all dots are below horizontal red line).

Figure S2

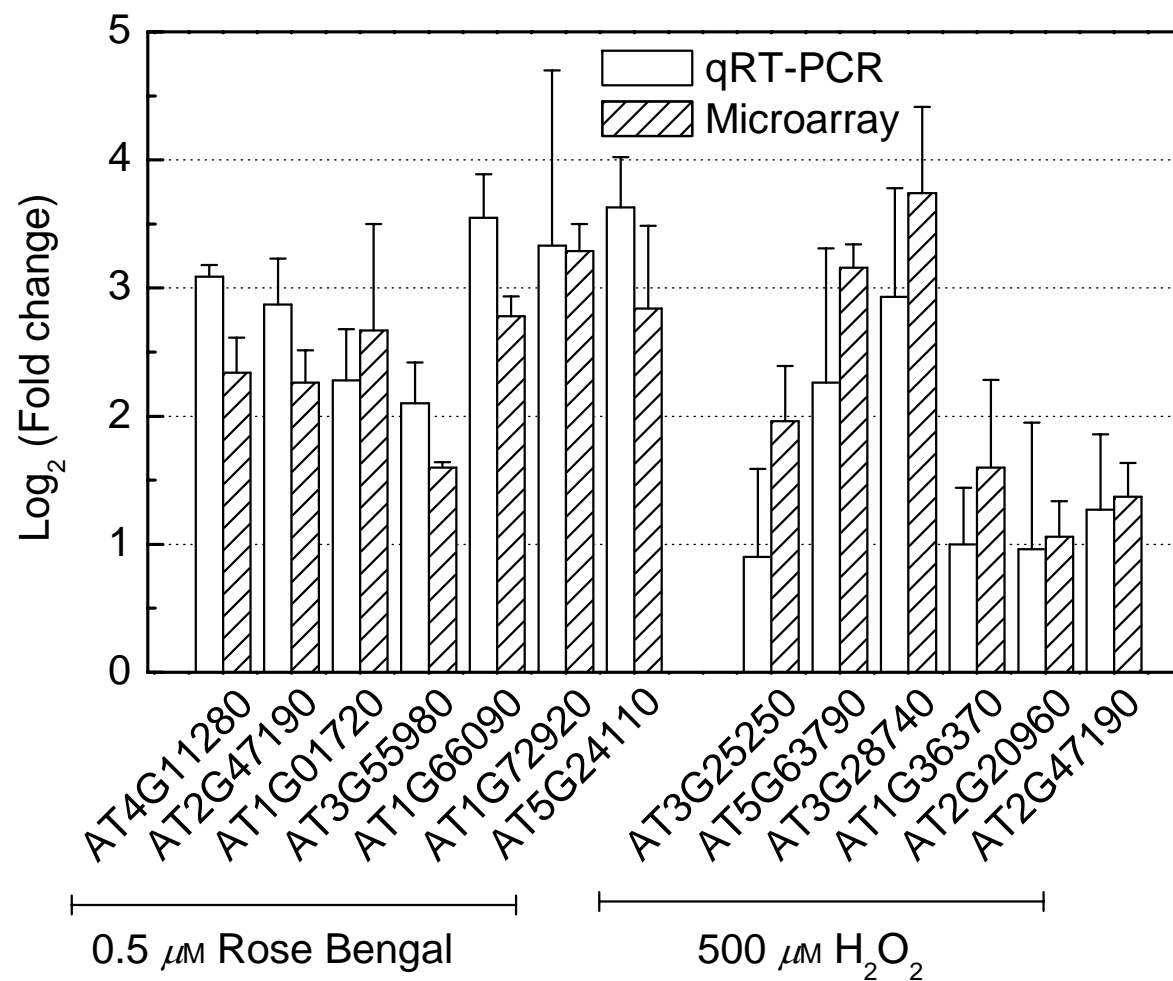

**Supplemental Figure S2.** Validation of the microarray experiments in ACSC after the 30-min treatments with 0.5  $\mu\text{M}$  RB and 500  $\mu\text{M}$  H<sub>2</sub>O<sub>2</sub>. Selected transcripts showed statistically significant differential expression under the assayed experimental conditions (adjusted  $p$ -value < 0.05).

**Table S1.** Transcripts and their corresponding primers selected for monitoring early ROS-mediated responses in ACSC under (photo)oxidative stress.

| <b>Locus Identifier</b> | <b>Name</b>                                       | <b>Marker</b>                 | <b>Expression<sup>a</sup></b>                               | <b>Primers</b>                                                         |
|-------------------------|---------------------------------------------------|-------------------------------|-------------------------------------------------------------|------------------------------------------------------------------------|
| At2g43510               | <i>DEF, DEFENSIN-LIKE FAMILY PROTEIN</i>          | Oxidative stress              | Response to fungus, herbivores and general abiotic stress   | F: 5'- GGCTATCGTTTCCATCTTCGT -3'<br>R: 5'- CCAACATCACCTCCGTATTCTT -3'  |
| At5g64870               | <i>NOD, NODULIN-LIKE PROTEIN</i>                  | <sup>1</sup> O <sub>2</sub>   | Up-regulated in the presence of <sup>1</sup> O <sub>2</sub> | F: 5'- GAGGTCCTCAAAGGAACAAAGGAG -3'<br>R: 5'- CTGCTTCACATTGGCGTTG -3'  |
| At1g17380               | <i>JAZ5, JASMONATE-ZIM-DOMAIN PROTEIN 5</i>       | <sup>1</sup> O <sub>2</sub>   | Response to jasmonic acid stimulus and HL stress            | F: 5'- ATTCCAGTCTCGCGTTGC -3'<br>R: 5'- AGGTAGAGGGTTCGCCTTTG -3'       |
| At3g55980               | <i>SZF1, SALT-INDUCIBLE ZINC FINGER PROTEIN 1</i> | <sup>1</sup> O <sub>2</sub>   | Response to MeJA, chitin, salt, pathogens and HL stress     | F: 5'- ACCCACCACAACACAATTCC -3'<br>R: 5'- TTGCTCTTTGGTCCACTGC -3'      |
| At4g21650               | <i>SUBT, SUBTILASE FAMILY PROTEIN</i>             | H <sub>2</sub> O <sub>2</sub> | Involved in proteolysis                                     | F: 5'- TGGAGCCTTAGACAGTGATAGC -3'<br>R: 5'- GATTCAAGCATCTGGTGATGAG -3' |
| At5g26280               | <i>F9D12, TRAF-LIKE FAMILY PROTEIN</i>            | H <sub>2</sub> O <sub>2</sub> | Not described                                               | F: 5'- TAGGTCACAAAGGGCAGAGG -3'<br>R: 5'- GATGGTCGCTCTTCTCTCAAC -3'    |
| At4g05040               | <i>C17L7, ANKYRIN REPEAT FAMILY PROTEIN</i>       | H <sub>2</sub> O <sub>2</sub> | Not described                                               | F: 5'- GATAACGGCTTAACAGCTAGGG -3'<br>R: 5'- GCAGCAAACGTCATTGTGG -3'    |
| At2g19760               | <i>PROF, PROFILIN FAMILY PROTEIN</i>              | Internal Control              | Constitutive gene                                           | F: 5'- CCAAGGTGAACAAGGAGCTG -3'<br>R: 5'- CAAGTTGCATTGACCTCCAG -3'     |

<sup>a</sup>Gene expression in response to several environmental/biological conditions: *DEF* (Gadjev et al. 2006); *NOD*, *JAZ5*, *SZF1*, *SUBT*, *F9D12*, *C17L7* (Op den Camp et al., 2003; Gadjev et al., 2006; González-Pérez et al., 2011), and *PROF* (Laloi et al., 2007).

**Table S4.** Transcripts and their corresponding primers selected for validation of the microarray experiments in ACSC under (photo)oxidative stress.

| <b>Treatment</b> | <b>Locus Identifier</b>                   | <b>Annotation</b>                                             | <b>Primers</b>                                                         |
|------------------|-------------------------------------------|---------------------------------------------------------------|------------------------------------------------------------------------|
| 0.5 $\mu$ M RB   | At5g63790                                 | ANAC, NAC domain containing protein 102; transcription factor | F: 5'- CGGAGATGTGCGTCAGAAC-3'<br>R: 5'- TCCGGTCTCTATGCGAGAAG-3'        |
|                  | At4g11280                                 | ACC, 1-aminocyclopropane-1-carboxylic acid synthase 6         | F: 5'- CGGCGATGGTTTCTTAGTTC-3'<br>R: 5'- AGGCTTCCACCGTAATCTTG-3'       |
|                  | At1g72920                                 | TIR-NBS, toll-interleukin-resistance domain family protein    | F: 5'- GAGACGAGCATTGACCAGTTTAG -3'<br>R: 5'- CCCTCCCATTGCTTATTGTTG -3' |
|                  | At1g01720                                 | ATAF1, NAC domain containing protein 2; transcription factor  | F: 5'- GCAAAGCTCCAAAGGGAGAG -3'<br>R: 5'- TGTAATCCGGCAGAGAACC -3'      |
|                  | At3g55980                                 | SZF1, zinc finger (CCCH-type) family protein                  | F: 5'- ACCCACCACAACAATTCC-3'<br>R: 5'- TTGCTCTTTGGTCCACTGC-3'          |
|                  | At1g66090                                 | TIR-NBS, toll-interleukin-resistance domain family protein    | F: 5'- CCACGCTTTGACCTGTGTG-3'<br>R: 5'- GATCATGTTTGCCTCATCGTC-3'       |
|                  | At5g24110                                 | WRKY30, WRKY DNA-binding protein 30; transcription factor     | F: 5'- TGGACGATGGATTCAGTTGG -3'<br>R: 5'- TGTTTAGTGGCTTCACATCCTTG -3'  |
|                  | 500 $\mu$ M H <sub>2</sub> O <sub>2</sub> | At1g36370                                                     | SHM7, serine hydroxymethyltransferase 7                                |
| At3g28740        |                                           | CYP81, cytochrome P450 family protein                         | F: 5'- GCCTGATTACTACACGGATGTGA -3'<br>R: 5'- GATGTATCAGTCCCGCAAG -3'   |
| At2g47190        |                                           | MYB2, myb domain protein 2; transcription factor              | F: 5'- CACATCGCTCGTTCCTCTG -3'<br>R: 5'- GTTGCCTCTTCTAACATCTGGAC -3'   |
| At2g20960        |                                           | PEARL4, phospholipase-like protein 4                          | F: 5'- GGCAATCCTTTCCATGAGTG -3'<br>R: 5'- GAGGAGTCTGATCCCTGCTG -3'     |
| At3g25250        |                                           | OXI1, oxidative signal-inducible1; kinase                     | F: 5'- AGGAAAATGCAATCGGAAAG-3'<br>R: 5'- TTGGATCATCACATTGTCTGG-3'      |
| At5g63790        |                                           | ANAC, NAC domain containing protein 102; transcription factor | F: 5'- CGGAGATGTGCGTCAGAAC-3'<br>R: 5'- TCCGGTCTCTATGCGAGAAG-3'        |

**Table S5.** Fold changes ( $\text{Log}_2$ ) in the expression of selected transcripts responding to ROS production in ACSC after the 30-min treatment with RB, MV and IC at  $0.5 \mu\text{M}$ , and  $\text{H}_2\text{O}_2$  at  $500 \mu\text{M}$ . \*  $p$ -value < 0.05

| Transcript   | Marker                 | RB           |             | MV          |             | IC          |             | $\text{H}_2\text{O}_2$ |             |
|--------------|------------------------|--------------|-------------|-------------|-------------|-------------|-------------|------------------------|-------------|
|              |                        | Light        | Dark        | Light       | Dark        | Light       | Dark        | Light                  | Dark        |
| <i>NOD</i>   | $^1\text{O}_2$         | 1.32± 0.33*  | 0.42± 0.58  | 0.20± 0.76  | -0.24± 0.29 | 0.36± 0.35  | -0.54± 0.02 | -0.01± 0.12            | 0.02± 0.41  |
| <i>JAZ5</i>  | $^1\text{O}_2$         | -0.06± 0.67  | 0.35± 0.66  | -0.22± 0.69 | -0.06± 0.50 | 0.57± 0.69  | 0.06± 0.16  | 0.26± 1.18             | 0.91± 1.16  |
| <i>SZF1</i>  | $^1\text{O}_2$         | 1.48± 0.73*  | 0.31± 0.21  | 0.44± 0.59  | 0.03± 0.37  | 0.24± 0.24  | -0.39± 0.34 | 0.69± 0.62             | 0.76± 0.91  |
| <i>SUBT</i>  | $\text{H}_2\text{O}_2$ | -2.80± 0.98* | -0.20± 0.90 | -0.07± 0.27 | -0.24± 0.43 | 0.03± 0.26  | -0.47± 0.60 | -0.45± 0.51            | -0.12± 1.11 |
| <i>F9D12</i> | $\text{H}_2\text{O}_2$ | -0.99± 0.61  | -0.07± 0.23 | 0.16± 0.34  | 0.08± 0.29  | 0.10± 0.26  | -0.38± 0.08 | -0.08± 0.60            | -0.04± 0.47 |
| <i>C17L7</i> | $\text{H}_2\text{O}_2$ | -0.30± 1.14  | 0.03± 0.94  | 0.16± 0.12  | -0.03± 0.58 | -0.51± 0.67 | 0.08± 0.57  | 0.23± 0.86             | -0.21± 0.71 |
| <i>DEF</i>   | Oxidative stress       | -0.05± 0.85  | 0.09± 0.40  | 0.31± 0.18  | -0.04± 0.15 | 0.14± 0.29  | 0.17± 0.39  | 0.67± 0.52             | 0.76± 0.26* |

**Table S6.** Up-regulated specific markers for  $^1\text{O}_2$  in ACSC after several chemical treatments.

|                                        | <i>Locus Identifier</i>                                 | <i>Description</i>                                             |
|----------------------------------------|---------------------------------------------------------|----------------------------------------------------------------|
| ACSC treated with 0.5 $\mu\text{M}$ RB | At5g47240                                               | NUDT8, <i>Arabidopsis thaliana</i> Nudix hydrolase homolog 8   |
|                                        | At1g58420                                               | Similar to unknown protein (TAIR:AT1G10140.1)                  |
|                                        | At3g16720                                               | ATL2; Protein binding / zinc ion binding                       |
|                                        | At2g27830                                               | Similar to pentatricopeptide (PPR) repeat-containing protein   |
|                                        | At1g43000                                               | Zinc-binding family protein                                    |
|                                        | At1g30370                                               | Lipase class 3 family protein                                  |
|                                        | At5g59450                                               | SCL11, Scarecrow-like transcription factor 11                  |
|                                        | At3g45640                                               | MPK3, Mitogen-Activated Protein Kinase 3                       |
|                                        | At5g47230                                               | ERF5, Ethylene Responsive Element Binding Factor 5             |
|                                        | At5g14930                                               | SAG101, Senescence-Associated Gene 101; triacylglycerol lipase |
|                                        | At3g44260                                               | CCR4-NOT, Transcription complex protein, putative              |
|                                        | At5g51190                                               | AP2 domain-containing transcription factor, putative           |
|                                        | At1g73540                                               | NUDT21, <i>Arabidopsis thaliana</i> Nudix hydrolase homolog 21 |
|                                        | At2g30360                                               | CIPK11, SOS3-interacting protein 4                             |
|                                        | At1g74930                                               | ORA47; DNA binding / transcription factor                      |
|                                        | At5g58430                                               | EXO70B1, Exocyst subunit EXO70 family protein B1               |
|                                        | At1g67970                                               | HSFA8, Heat shock transcription factor A8                      |
| At3g18690                              | MKS1, MAP Kinase Substrate 1                            |                                                                |
| At2g44840                              | ERF13, Ethylene-Responsive Element Binding Factor 13    |                                                                |
| At5g28630                              | Glycine-rich protein                                    |                                                                |
| At2g47180                              | GOLS1, Galactinol Synthase 1                            |                                                                |
| At3g06490                              | MYB108, MYB Domain Protein 108                          |                                                                |
| At2g35710                              | Glycogenin glucosyltransferase                          |                                                                |
| At5g42650                              | AOS, Allene Oxide Synthase                              |                                                                |
| At5g64660                              | U-box domain-containing protein                         |                                                                |
| At3g57120                              | Protein kinase family protein                           |                                                                |
| At3g46930                              | Protein kinase family protein                           |                                                                |
| At4g36500                              | Similar to unknown protein (TAIR:AT2G18210.1)           |                                                                |
| At3g14200                              | DNAJ heat shock N-terminal domain-containing protein    |                                                                |
| At3g46620                              | Zinc finger (C3HC4-type RING finger) family protein     |                                                                |
| At2g18210                              | similar to unknown protein (TAIR:AT4G36500.1)           |                                                                |
| At2g29450                              | GSTU5, Glutathione S-transferase (class tau) 5          |                                                                |
| At4g11350                              | Transferase, transferring glycosyl groups               |                                                                |
| At3g25730                              | AP2 domain-containing transcription factor, putative    |                                                                |
| At1g14040                              | ATPase, coupled to transmembrane movement of substances |                                                                |
| At5g10830                              | Embryo-abundant protein-related                         |                                                                |
| At1g51620                              | Protein kinase family protein                           |                                                                |
| At4g28350                              | Lectin protein kinase family protein                    |                                                                |
| At1g11670                              | MATE efflux family protein                              |                                                                |
| At5g56980                              | Similar to unknown protein (TAIR:AT4G26130.1)           |                                                                |
| At5g16970                              | AER, 2-Alkenal reductase                                |                                                                |
| At5g44070                              | CAD1, Cadmium Sensitive 1                               |                                                                |
| At1g09940                              | HEMA2; Glutamyl-tRNA reductase                          |                                                                |

ACSC treated with 500  $\mu\text{M}$   $\text{H}_2\text{O}_2$

**Table S7.** Tree view of over-represented GO/biological process terms in Arabidopsis cell suspension culture after the 30-min treatment with 0.5  $\mu\text{M}$  RB (adjusted  $p$ -value < 0.05).

| <i>GO accession</i>     | <i>Synonyms</i>                                                       |
|-------------------------|-----------------------------------------------------------------------|
|                         | <b>Response to stimulus</b>                                           |
| GO:0042221 <sup>a</sup> | Response to chemical stimulus                                         |
| GO:0010033              | Response to organic substance                                         |
| GO:0009743              | Response to carbohydrate stimulus                                     |
| GO:0010200 <sup>a</sup> | Response to chitin                                                    |
| GO:0009751 <sup>a</sup> | Response to salicylic acid stimulus                                   |
| GO:0009863              | Salicylic acid mediated signalling pathway                            |
| GO:0009636 <sup>a</sup> | Response to toxin                                                     |
| GO:0006979 <sup>a</sup> | Response to oxidative stress                                          |
| GO:0006955 <sup>a</sup> | Immune response                                                       |
| GO:0045087 <sup>a</sup> | Innate immune response                                                |
| GO:0009814              | Resistance response to pathogen                                       |
| GO:0009627              | Salicylic acid-dependent systemic resistance                          |
| GO:0006950 <sup>a</sup> | Response to stress                                                    |
| GO:0006952 <sup>a</sup> | Defence response                                                      |
| GO:0031347              | Down-regulation of defence response.                                  |
| GO:0031348 <sup>a</sup> | Negative regulation of defence response                               |
| GO:0009611              | Response to wounding                                                  |
| GO:0006970              | Response to osmotic stress                                            |
| GO:0009628 <sup>a</sup> | Response to abiotic stimulus                                          |
| GO:0009266 <sup>a</sup> | Response to temperature stimulus                                      |
| GO:0009408 <sup>a</sup> | Response to heat                                                      |
| GO:0009409              | Response to cold                                                      |
| GO:0009607 <sup>a</sup> | Response to biotic stimulus                                           |
| GO:0051707 <sup>a</sup> | Response to other organism                                            |
| GO:0009617 <sup>a</sup> | Response to bacterium                                                 |
|                         | <b>Metabolic process</b>                                              |
| GO:0051171              | Regulation of nitrogen compound metabolic process                     |
| GO:0006139              | Nucleobase, nucleoside, nucleotide and nucleic acid metabolic process |
| GO:0006350              | Transcription                                                         |
| GO:0045449              | Regulation of transcription                                           |
| GO:0010468              | Regulation of gene expression                                         |
| GO:0016070              | RNA metabolic process                                                 |
| GO:0044267 <sup>a</sup> | Cellular protein metabolic process                                    |
| GO:0006457 <sup>a</sup> | Protein folding                                                       |
| GO:0043687 <sup>a</sup> | Post-translational protein modification                               |
| GO:0016567              | Protein ubiquitination                                                |
| GO:0051603              | Proteolysis involved in cellular protein catabolic process            |
| GO:0019941              | Modification-dependent protein catabolic process                      |
| GO:0006520 <sup>a</sup> | Cellular amino acid metabolic process                                 |
|                         | <b>Cellular process</b>                                               |
| GO:0007049 <sup>a</sup> | Cell cycle                                                            |
| GO:0007017 <sup>a</sup> | Microtubule-based process                                             |
|                         | <b>Developmental process</b>                                          |
| GO:0012501              | Programmed cell death                                                 |
| GO:0006915              | Apoptosis                                                             |

<sup>a</sup>GO terms also over-represented in the treatment with 500  $\mu\text{M}$  H<sub>2</sub>O<sub>2</sub>

**Table S8.** Tree view of the over-represented GO/biological process terms in Arabidopsis cell suspension culture after the 30-min treatment with 500  $\mu\text{M}$   $\text{H}_2\text{O}_2$  (adjusted  $p$ -value < 0.05).

| <i>GO accession</i>     | <i>Synonyms</i>                         |
|-------------------------|-----------------------------------------|
|                         | <b>Response to stimulus</b>             |
| GO:0042221 <sup>a</sup> | Response to chemical stimulus           |
| GO:0006979 <sup>a</sup> | Response to oxidative stress            |
| GO:0009751 <sup>a</sup> | Response to salicylic acid stimulus     |
| GO:0009636 <sup>a</sup> | Response to toxin                       |
| GO:0009407              | Toxic catabolic process                 |
| GO:0010200 <sup>a</sup> | Response to chitin                      |
| GO:0010038              | Response to metal ion                   |
| GO:0046686              | Response to cadmium ion                 |
| GO:0006955 <sup>a</sup> | Immune response                         |
| GO:0045087 <sup>a</sup> | Innate immune response                  |
| GO:0006950 <sup>a</sup> | Response to stress                      |
| GO:0006952 <sup>a</sup> | Defence response                        |
| GO:0031348 <sup>a</sup> | Negative regulation of defence response |
| GO:0009628 <sup>a</sup> | Response to abiotic stimulus            |
| GO:0009266 <sup>a</sup> | Response to temperature stimulus        |
| GO:0009408 <sup>a</sup> | Response to heat                        |
| GO:0009607 <sup>a</sup> | Response to biotic stimulus             |
| GO:0051707 <sup>a</sup> | Response to other organism              |
| GO:0009617 <sup>a</sup> | Response to bacterium                   |
| GO:0009605              | Response to external stimulus           |
|                         | <b>Metabolic process</b>                |
| GO:0007154              | Cell communication                      |
| GO:0007165              | Signal transduction                     |
| GO:0007242              | Intracellular signalling cascade        |
| GO:0010017              | Red or far red light signalling pathway |
| GO:0006793              | Phosphorus metabolic process            |
| GO:0006796              | Phosphate metabolic process             |
| GO:0016311              | Dephosphorylation                       |
| GO:0006468              | Protein amino acid phosphorylation      |
| GO:0006470              | Protein amino acid dephosphorylation    |
| GO:0044267 <sup>a</sup> | Cellular protein metabolic process      |
| GO:0006457 <sup>a</sup> | Protein folding                         |
| GO:0006464              | Protein modification process            |
| GO:0043687 <sup>a</sup> | Post-translational protein modification |
| GO:0019752              | Carboxylic acid metabolic process       |
| GO:0009308              | Amine metabolic process                 |
| GO:0006520 <sup>a</sup> | Cellular amino acid metabolic process   |
| GO:0006396              | RNA processing                          |
| GO:0006364              | rRNA processing                         |
| GO:0019748              | Secondary metabolism                    |
| GO:0046907              | Intracellular transport                 |
|                         | <b>Cellular process</b>                 |
| GO:0007049 <sup>a</sup> | Cell cycle                              |
| GO:0051301              | Cell division                           |
| GO:0007017 <sup>a</sup> | Microtubule-based process               |
| GO:0007018              | Microtubule-based movement              |
| GO:0051276              | Chromosome organization                 |
|                         | <b>Developmental process</b>            |
| GO:0008219              | Cell death                              |

<sup>a</sup>GO terms also over-represented in the treatment with 0.5  $\mu\text{M}$  RB



**Table S9.** Pearson's correlation between different experimental conditions and arabidopsis mutants<sup>a</sup>.

|                                             | <i>flu</i> /over-tAPX<br>vs over-tAPX | <i>flu</i> vs<br>Columbia | UV 310 nm<br>vs 327 nm | HL exposed<br>vs LL plants | HL ACSC vs<br>dark ACSC | RB-treated<br>ACSC vs LL | HL CAT2HP1<br>vs LL CAT2HP1 | HL <i>npq1lut2</i><br>vs LL <i>npq1lut2</i> | HL <i>hy5</i> vs<br>LL <i>hy5</i> |
|---------------------------------------------|---------------------------------------|---------------------------|------------------------|----------------------------|-------------------------|--------------------------|-----------------------------|---------------------------------------------|-----------------------------------|
| <i>flu</i> /over-tAPX vs<br>over-tAPX       | 1.0000                                | 0.9741                    | 0.6782                 | 0.6520                     | 0.5276                  | 0.6894                   | 0.6350                      | 0.2374                                      | -0.1945                           |
| <i>flu</i> vs Ler                           |                                       | 1.0000                    | 0.6955                 | 0.6652                     | 0.5075                  | 0.6960                   | 0.6142                      | 0.2412                                      | -0.1683                           |
| UV 310 nm vs<br>327 nm cut-off              |                                       |                           | 1.0000                 | 0.4014                     | 0.4203                  | 0.6195                   | 0.5434                      | 0.0966                                      | -0.2173                           |
| HL exposed<br>plants vs LL                  |                                       |                           |                        | 1.0000                     | 0.3600                  | 0.4529                   | 0.3735                      | 0.1611                                      | -0.1047                           |
| HL ACSC vs<br>dark ACSC                     |                                       |                           |                        |                            | 1.0000                  | 0.5939                   | 0.0818                      | -0.0253                                     | -0.5713                           |
| RB-treated<br>ACSC vs LL                    |                                       |                           |                        |                            |                         | 1.0000                   | 0.4479                      | 0.2354                                      | -0.2852                           |
| HL CAT2HP1<br>vs LL CAT2HP1                 |                                       |                           |                        |                            |                         |                          | 1.0000                      | 0.2457                                      | 0.1376                            |
| HL <i>npq1lut2</i> vs<br>LL <i>npq1lut2</i> |                                       |                           |                        |                            |                         |                          |                             | 1.0000                                      | 0.2164                            |
| HL <i>hy5</i> vs<br>LL <i>hy5</i>           |                                       |                           |                        |                            |                         |                          |                             |                                             | 1.0000                            |

<sup>a</sup>Microarray data for the selected experimental conditions and arabidopsis mutants were obtained from the following references: op den Camp et al., 2003; Gadjev et al., 2006; Brosche et al., 2002; Ulm et al., 2004; Rossel et al., 2007; González-Pérez et al., 2011; this study; Vanderauwera et al., 2005; Alboresi et al., 2011; Kleine et al., 2007.
